# Supplementary material for: Anti-CCL2 antibody combined with etoposide prolongs survival in a minimal residual disease mouse model of neuroblastoma
Source: PubMed Central journal article supplement (PMC10645976; doi:10.1038/s41598-023-46968-2), 2023-11-14

# Supplementary Figure S1

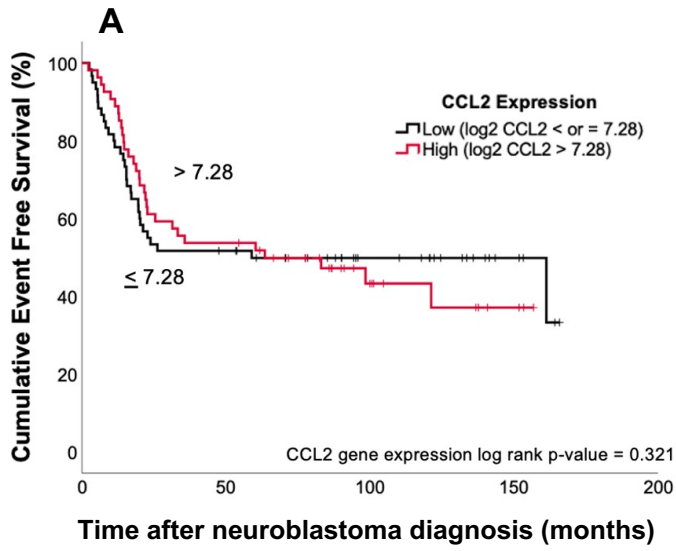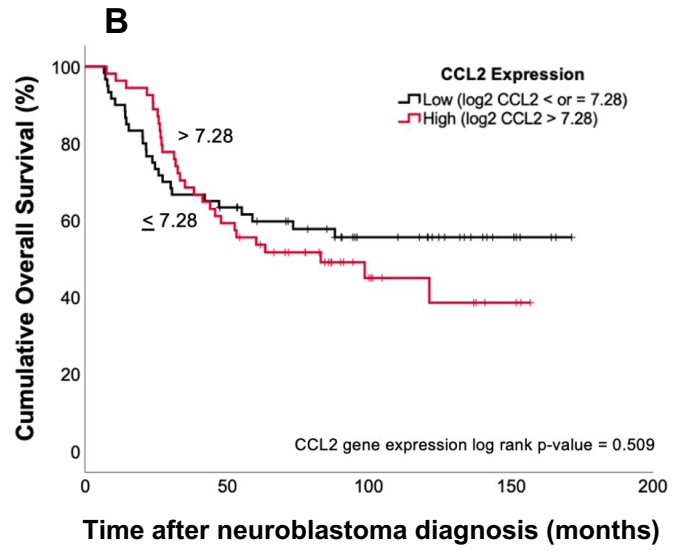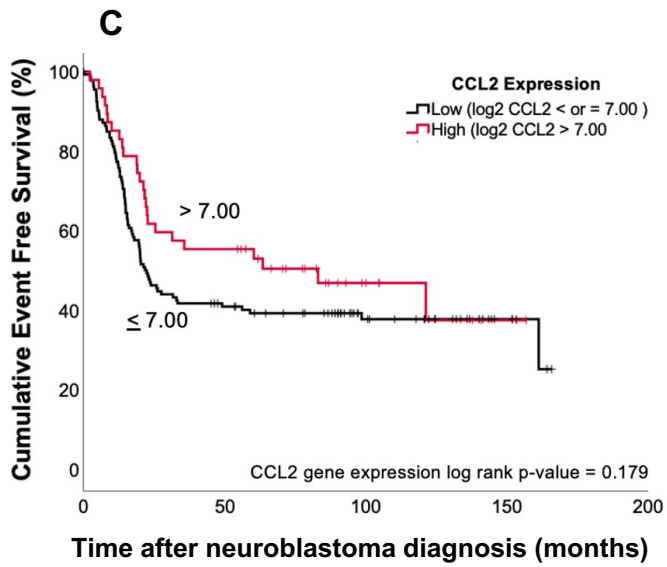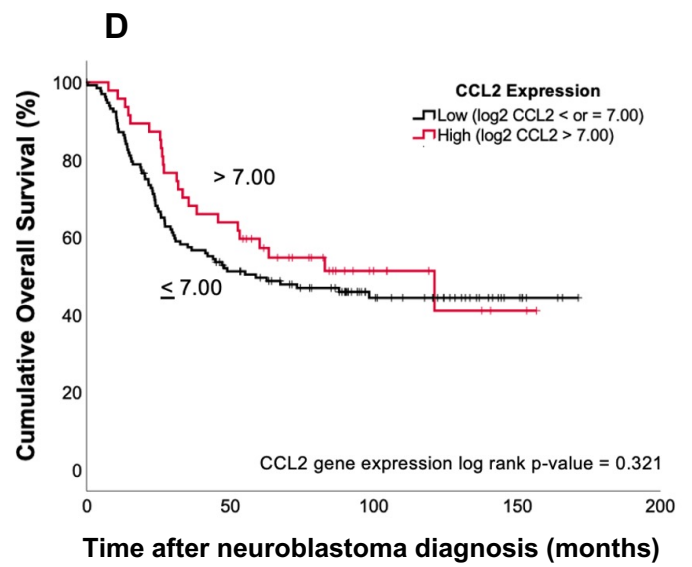

Supplement: 41598_2023_46968_MOESM1_ESM.pdf [file 41598_2023_46968_MOESM1_ESM.pdf]
